# Supplementary material
Source: MDPI journal article supplement (https://www.mdpi.com/2073-4441/15/12/2237)

## Supplementary materials

Table S1. Catchment descriptors.

| Attributes               | CD                                                        | WS1      | WS2      | WS3      | WS4      |
|--------------------------|-----------------------------------------------------------|----------|----------|----------|----------|
| Topography / Morphometry | Drainage area (A), km <sup>2</sup>                        | 1116.0   | 623.9    | 197.1    | 69.9     |
|                          | Perimeter (P), km                                         | 198.0    | 131.8    | 93.2     | 56.8     |
|                          | Basin length (L <sub>b</sub> ), km                        | 54.6     | 35.1     | 32.1     | 17.1     |
|                          | Mean slope, °                                             | 16.3     | 18.4     | 18.9     | 18.2     |
|                          | Elevation range (H <sub>min</sub> , H <sub>max</sub> ), m | 14, 1469 | 56, 1469 | 56, 1309 | 45, 1271 |
|                          | Gravelius coefficient (K <sub>G</sub> ),                  | 1.7      | 1.5      | 1.9      | 1.9      |
|                          | Effective basin width (R <sub>b</sub> ), km               | 20.4     | 17.8     | 6.1      | 4.1      |
|                          | Elongation ratio (R <sub>e</sub> ),                       | 0.7      | 0.8      | 0.5      | 0.6      |
|                          | Unit shape factor (R <sub>u</sub> )                       | 1.6      | 1.4      | 2.3      | 2.0      |
|                          | Total relief (R <sub>t</sub> )                            | 1455     | 1413     | 1253     | 1226     |
|                          | Relative relief (R <sub>r</sub> ), km                     | 1.4      | 1.4      | 1.2      | 1.2      |
|                          | Relief ratio (R <sub>n</sub> )                            | 0.03     | 0.04     | 0.04     | 0.07     |
|                          | Total stream length (L <sub>t</sub> )                     | 1153.8   | 621.9    | 206.2    | 70.5     |
|                          | Length of main stream (L <sub>c</sub> ), km               | 94.0     | 49.3     | 31.4     | 9.9      |
|                          | Total number of stream segment (N <sub>u</sub> )          | 5652.0   | 3647.0   | 1166.0   | 426.0    |
|                          | Drainage density (D <sub>d</sub> ), km.km <sup>-2</sup>   | 1.03     | 1.00     | 1.05     | 1.00     |
|                          | Constant of channel maintenance (C <sub>m</sub> )         | 0.97     | 1.00     | 0.96     | 0.99     |
|                          | Ruggedness number (R <sub>n</sub> )                       | 1.5      | 1.4      | 1.3      | 1.2      |
| Land cover               | Crop                                                      | 35.6     | 15       | 36.3     | 40.8     |
|                          | Mos                                                       | 9.6      | 7.6      | 23.1     | 10.7     |
|                          | Tree                                                      | 54.7     | 77.4     | 40.6     | 48.4     |
|                          | CN_est                                                    | 63.3     | 58.7     | 64.1     | 64.5     |
| Soil                     | Acrisols (Acri)                                           | 24.7     | 7.9      | 18.9     | 30.5     |
|                          | Ferrasols (Ferra)                                         | 73.1     | 90.1     | 78.8     | 64.7     |
|                          | Lixisols (Lixi)                                           | 1.7      | 1.2      | 2.3      | 4.7      |
|                          | Cambisols (Cambi)                                         | 0.4      | 0.7      | 0        | 0.2      |
|                          | Sandy-Clay (S-C)                                          | 0.5      | 0.4      | 0.8      | 0.0      |
|                          | Clay-Loam (C-L)                                           | 28.4     | 29.0     | 42.0     | 47.5     |
|                          | Sandy-Clay-Loam (S-C-L)                                   | 71.0     | 70.6     | 57.2     | 52.5     |
|                          | Organic Carbon Density OC (g/dm <sup>3</sup> )            | 362.2    | 371.7    | 383.7    | 373.4    |
|                          | Dg (µm)                                                   | 299.0    | 295.1    | 301.2    | 294.4    |
|                          | Moderate runoff potential (H-C)                           | 34.8     | 28.5     | 18.5     | 48.8     |
|                          | High runoff potential (H-D)                               | 65.2     | 71.5     | 81.5     | 51.2     |
| Geology                  | Gneiss                                                    | 14.3     | 22.6     | 0.0      | 0.9      |
|                          | Gran                                                      | 70.7     | 64.0     | 88.9     | 55.5     |
|                          | Shales                                                    | 6.4      | 1.8      | 0.0      | 43.6     |
|                          | Quartz.                                                   | 8.6      | 11.6     | 11.1     | 0.0      |

Table S2. Hydrological signatures.

| HSs             | WS 1 | WS 2 | WS 3 | WS 4 |
|-----------------|------|------|------|------|
| BFI [-]         | 0.63 | 0.60 | 0.68 | 0.68 |
| Rc [-]          | 0.34 | 0.09 | 0.13 | 0.26 |
| Qp [mm/h]       | 0.66 | 0.34 | 0.71 | 1.38 |
| ts [h/km]       | 0.11 | 0.13 | 0.11 | 0.22 |
| Q5 [mm/day]     | 8.65 | 5.72 | 6.05 | 7.4  |
| Q95 [mm/day]    | 1.25 | 0.87 | 1.58 | 1.60 |
| q_mean [mm/day] | 3.93 | 2.80 | 3.22 | 3.78 |

Figure S1. Correlation between the selected CDs and HSs (WS1 = green; WS2 = red; WS3 = blue; WS4 = grey).

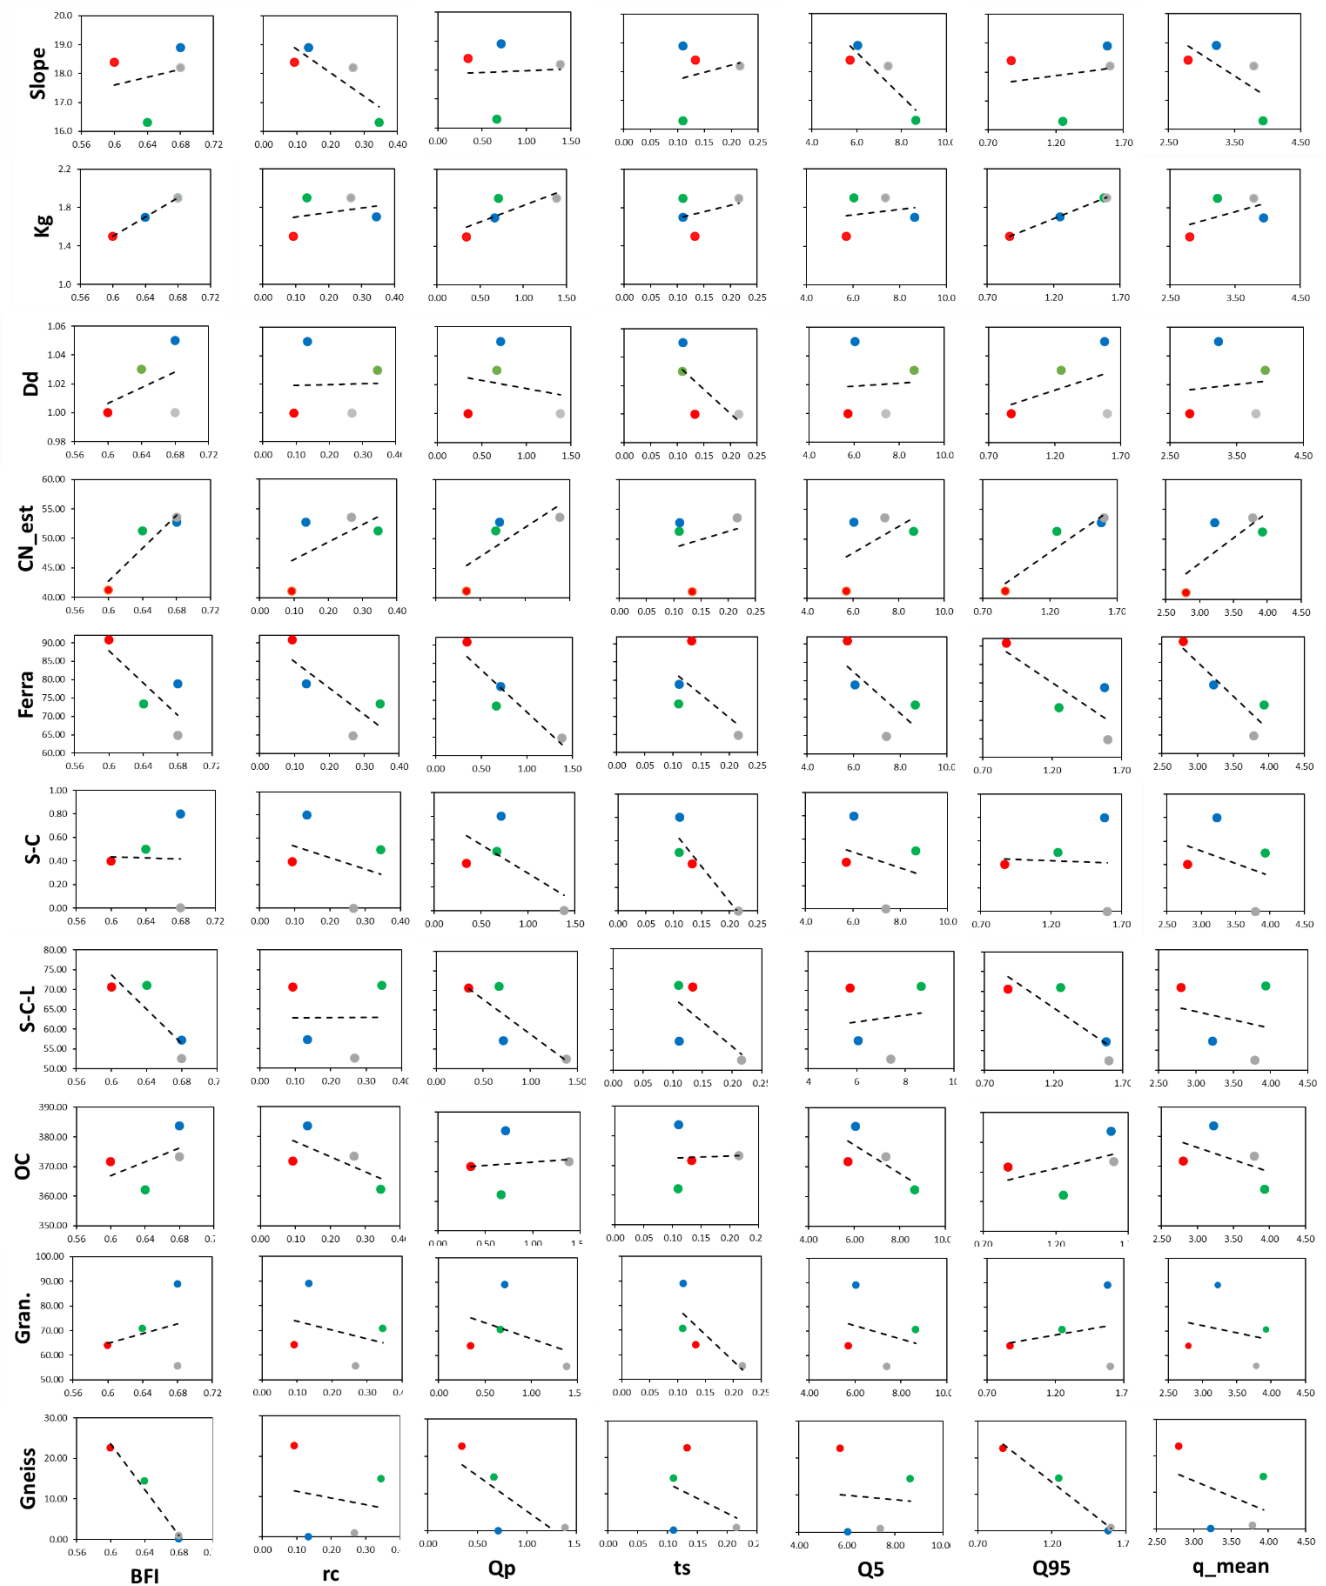

Supplement: s1 [file s1]
